# Supplementary material
Source: Springer Nature journal article supplement (https://www.springermedizin.de/resource/supplementary/12889_2012_4704_MOESM5_ESM.pdf/9493554)

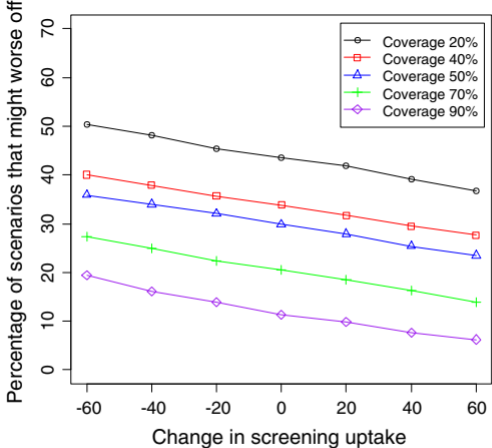

Decreased  
Screening

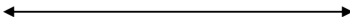

Increased  
screening

Supplement: MOESM5 [file 9493554]
